# Supplementary material
Source: publisher figshare collection journal article supplement (https://karger.figshare.com/ndownloader/files/27670968)
Supplement: Supplementary file 1 [file 27670968]

**Tab. S4**:Results of logistic regression analysis for comparison of groups Con+oLiD vs. aLiC.

| **Effect** | **Regression coefficient** | **p-value**** | **Odds ratio** | **Lower CL** | **Upper CL** |
| --- | --- | --- | --- | --- | --- |
| Ala | 2.35 | 0.03 | 10.46 | 1.23 | 88.95 |
| Arg | 0.16 | 0.83 | 1.17 | 0.27 | 5.18 |
| Asn | 2.77 | 0.07 | 15.93 | 0.78 | 323.37 |
| Cit | -1.28 | 0.35 | 0.28 | 0.02 | 4.12 |
| Glu | 2.89 | 0.06 | 18.03 | 0.94 | 347.80 |
| Gly | 2.70 | 0.07 | 14.81 | 0.81 | 271.58 |
| His | 3.77 | 0.02 | 43.46 | 2.08 | 908.36 |
| Ile | 3.03 | 0.03 | 20.64 | 1.31 | 324.67 |
| Leu | 2.99 | 0.02 | 19.98 | 1.54 | 259.44 |
| Met | 0.61 | 0.47 | 1.84 | 0.35 | 9.67 |
| Orn | 1.91 | 0.11 | 6.72 | 0.63 | 71.87 |
| Phe | 2.01 | 0.10 | 7.44 | 0.66 | 83.60 |
| Pro | 0.96 | 0.33 | 2.62 | 0.37 | 18.37 |
| Thr | 1.95 | 0.07 | 7.03 | 0.83 | 59.62 |
| Trp | 2.59 | 0.09 | 13.38 | 0.69 | 259.88 |
| Tyr | -0.17 | 0.84 | 0.85 | 0.16 | 4.49 |
| ADMA | 0.74 | 0.55 | 2.09 | 0.18 | 24.14 |
| alpha_AAA | 2.49 | 0.01 | 12.02 | 1.68 | 86.12 |
| Creatinine | 1.69 | 0.08 | 5.40 | 0.82 | 35.62 |
| Kynurenine | 0.13 | 0.87 | 1.13 | 0.25 | 5.10 |
| Putrescine | -1.03 | 0.18 | 0.36 | 0.08 | 1.61 |
| Sarcosine | 2.33 | 0.11 | 10.29 | 0.60 | 177.58 |
| SDMA | 1.50 | 0.20 | 4.50 | 0.44 | 45.79 |
| t4-OH-Pro | -0.72 | 0.21 | 0.49 | 0.16 | 1.48 |
| Taurine | 2.24 | 0.03 | 9.43 | 1.29 | 68.69 |
| C0 | 1.46 | 0.18 | 4.30 | 0.52 | 35.53 |
| C2 | 0.41 | 0.53 | 1.50 | 0.42 | 5.42 |
| C3 | -1.16 | 0.38 | 0.31 | 0.02 | 4.20 |
| C3-DC (C4-OH) | 0.72 | 0.28 | 2.05 | 0.55 | 7.62 |
| C4 | 1.17 | 0.30 | 3.22 | 0.35 | 29.98 |
| C5-DC (C6-OH) | 0.43 | 0.60 | 1.53 | 0.31 | 7.61 |
| C6 (C4:1-DC) | 2.57 | 0.05 | 13.02 | 1.00 | 169.44 |
| C7-DC | 0.27 | 0.71 | 1.31 | 0.33 | 5.24 |
| C14 | 1.28 | 0.11 | 3.59 | 0.75 | 17.21 |
| C14:1 | 2.00 | 0.10 | 7.39 | 0.70 | 77.94 |
| C14:2 | 2.17 | 0.08 | 8.74 | 0.76 | 100.38 |
| C16 | 3.14 | 0.05 | 23.17 | 0.97 | 554.62 |
| C16:1 | 0.61 | 0.52 | 1.83 | 0.28 | 11.82 |
| C18:1 | 1.57 | 0.18 | 4.81 | 0.49 | 47.75 |
| lysoPC a C16:0 | 2.03 | 0.02 | 7.59 | 1.46 | 39.41 |
| lysoPC a C16:1 | 1.85 | 0.10 | 6.33 | 0.72 | 55.46 |
| lysoPC a C17:0 | 2.50 | 0.01 | 12.16 | 1.76 | 84.22 |
| lysoPC a C18:0 | 1.77 | 0.02 | 5.89 | 1.26 | 27.56 |
| lysoPC a C18:1 | 3.51 | 0.03 | 33.40 | 1.47 | 757.88 |
| lysoPC a C26:0 | 1.09 | 0.17 | 2.98 | 0.63 | 14.05 |
| lysoPC a C26:1 | 1.39 | 0.09 | 4.00 | 0.81 | 19.64 |
| lysoPC a C28:0 | 1.07 | 0.18 | 2.91 | 0.61 | 14.02 |
| lysoPC a C28:1 | 3.10 | 0.02 | 22.22 | 1.53 | 323.05 |
| PC aa C30:0 | 0.73 | 0.36 | 2.07 | 0.43 | 9.84 |
| PC aa C32:0 | 0.89 | 0.35 | 2.42 | 0.38 | 15.37 |
| PC aa C32:1 | 0.46 | 0.40 | 1.58 | 0.54 | 4.57 |
| PC aa C32:2 | 0.10 | 0.61 | 1.11 | 0.74 | 1.66 |
| PC aa C34:3 | 2.25 | 0.04 | 9.48 | 1.13 | 79.49 |
| PC aa C36:1 | 1.90 | 0.09 | 6.72 | 0.74 | 60.62 |
| PC aa C36:2 | 3.27 | 0.02 | 26.20 | 1.57 | 436.02 |
| PC aa C36:3 | 3.42 | 0.03 | 30.72 | 1.44 | 654.19 |
| PC aa C36:6 | 3.43 | 0.03 | 30.74 | 1.39 | 680.98 |
| PC aa C38:1 | 1.87 | 0.04 | 6.49 | 1.14 | 37.05 |
| PC aa C38:3 | 3.40 | 0.03 | 29.92 | 1.47 | 610.24 |
| PC aa C38:6 | 3.17 | 0.02 | 23.72 | 1.64 | 343.48 |
| PC aa C40:3 | 2.76 | 0.07 | 15.77 | 0.81 | 305.31 |
| PC aa C40:6 | 2.95 | 0.01 | 19.03 | 1.89 | 191.58 |
| PC aa C42:1 | 3.22 | 0.03 | 25.06 | 1.41 | 443.90 |
| PC aa C42:2 | 2.73 | 0.11 | 15.29 | 0.53 | 439.67 |
| PC aa C42:4 | 2.86 | 0.06 | 17.47 | 0.84 | 362.48 |
| PC aa C42:5 | 2.60 | 0.04 | 13.44 | 1.10 | 164.24 |
| PC aa C42:6 | 3.29 | 0.05 | 26.91 | 1.02 | 709.23 |
| PC ae C30:0 | 0.71 | 0.38 | 2.03 | 0.42 | 9.79 |
| PC ae C30:1 | -0.53 | 0.23 | 0.59 | 0.25 | 1.40 |
| PC ae C32:1 | 1.26 | 0.23 | 3.51 | 0.44 | 27.84 |
| PC ae C32:2 | 2.90 | 0.06 | 18.11 | 0.93 | 353.49 |
| PC ae C34:0 | 2.14 | 0.08 | 8.54 | 0.75 | 97.11 |
| PC ae C34:1 | 2.99 | 0.07 | 19.88 | 0.79 | 499.18 |
| PC ae C36:0 | 0.54 | 0.62 | 1.71 | 0.20 | 14.54 |
| PC ae C38:1 | 0.52 | 0.48 | 1.68 | 0.40 | 7.12 |
| PC ae C38:2 | 1.76 | 0.11 | 5.83 | 0.66 | 51.21 |
| PC ae C44:4 | 2.89 | 0.11 | 17.97 | 0.51 | 631.56 |
| PC ae C44:5 | 2.03 | 0.15 | 7.61 | 0.48 | 120.29 |
| SM (OH) C22:1 | 2.18 | 0.01 | 8.86 | 1.58 | 49.58 |
| SM (OH) C24:1 | 1.90 | 0.03 | 6.71 | 1.17 | 38.47 |
| SM C18:0 | 2.98 | 0.01 | 19.70 | 1.95 | 198.91 |
| SM C24:0 | 3.46 | 0.01 | 31.90 | 2.11 | 481.79 |
| H1 | 2.63 | 0.09 | 13.83 | 0.64 | 300.45 |

Abbreviations: CL=confidence limit of 95% confidence interval.

* The following analytes were excluded because the confidence interval could not be reasonably estimated due to large numbers: Gln, Lys, Ser, Val, C5, C10, C18, C18:2, lysoPC a C18:2, lysoPC a C20:3, lysoPC a C20:4, PC aa C28:1, PC aa C32:3, PC aa C34:1, PC aa C34:2, PC aa C34:4, PC aa C36:0, PC aa C36:4, PC aa C36:5, PC aa C38:0, PC aa C38:4, PC aa C38:5, PC aa C40:2, PC aa C40:4, PC aa C40:5, PC aa C42:0, PC ae C34:2, PC ae C34:3, PC ae C36:1, PC ae C36:2, PC ae C36:3, PC ae C36:4, PC ae C36:5, PC ae C38:0, PC ae C38:3, PC ae C38:4, PC ae C38:5, PC ae C38:6, PC ae C40:1, PC ae C40:2, PC ae C40:3, PC ae C40:4, PC ae C40:5, PC ae C40:6, PC ae C42:1, PC ae C42:2, PC ae C42:3, PC ae C42:4, PC ae C42:5, PC ae C44:3, PC ae C44:6, SM (OH) C14:1, SM (OH) C16:1, SM (OH) C22:2, SM C16:0, SM C16:1, SM C18:1, SM C20:2, SM C24:1, SM C26:0, SM C26:1.

** obtained from Chi-Square test
